# Supplementary material for: Risk prediction for early-onset gastric carcinoma: a case-control study of polygenic gastric cancer in Han Chinese with hereditary background
Source: PubMed Central journal article supplement (PMC5085106; doi:10.18632/oncotarget.9025), 2016-04-26
Supplement: oncotarget-07-33608-s001.pdf [file oncotarget-07-33608-s001.pdf]

# Risk prediction for early-onset gastric carcinoma: a case-control study of polygenic gastric cancer in Han Chinese with hereditary background

## Supplementary Material

### Supplementary Methods

#### The multiplicative polygenic model

Each single-nucleotide polymorphism (SNP) has at least two alleles in two loci, which are named high-risk and low-risk alleles in genetic risk studies. Two copies of each locus combine three possibilities: two low-risk alleles, one low-risk and one high-risk allele, or two high-risk alleles. Three GWASs reported five susceptibility loci of gastric cancer globally [1-3]. In addition to rs2790 in the allele-specific study [4], we analysed 6 SNPs in our study. Assuming each locus is independent without interactions and the risk is allele-dose-dependent with a simple multiplicative (log-additive) effect, we calculated the combined effect on the relative-risk scale. In consistence with the polygenic model, the multiplicative model is adequate for cancer susceptibility study [5].

We assume the relative risk in monozygotic twins ( $\lambda_{\text{monozygotic}}$ ) and siblings ( $\lambda_{\text{sibling}}$ ) are related to each other and an estimation of  $\lambda_{\text{sibling}}$  equal to 2, as observed from many epidemiologic studies [6-8], which concludes

$$\lambda_{\text{monozygotic}} = \lambda_{\text{sibling}}^2 = 4$$

Assuming the standard deviation (s.d.) of monozygotic twins is in the polygenic log-normal risk distribution:

$$\text{s. d.} = \sqrt{\ln(\lambda_{\text{monozygotic}})}$$

this equation solves to predict an s.d. of 1.2.

According to the deduction in multiplicative polygenic model of breast cancer [9], the population attributable fraction is given by

$$\frac{2 p(1-p)(R-1)}{2 p(1-p)(R-1)+1} + \frac{(1-p)^2(R^2-1)}{(1-p)^2(R^2-1)+1}$$

Where  $p$  is the frequency and  $R$  is the relative risk for a single allele  $i$ .

Besides,  $r$  is defined as the log risk, and  $E$  as the expected value of  $r$ .

For the single allele  $i$ , the variance  $V_i$  of the risk distribution is given by

$$V_i = (1-p)^2 E^2 + 2 p(1-p)(r-E)^2 + p^2(2r-E)^2$$

For multiple risk alleles, the risk distribution tends towards the normal with variance

$$V = \sum V_i$$

where  $V$  is the total genetic variance with an estimation value of 1.44.

Thus, the risk fraction explained by a single allele is estimated as  $V_i/V$

Supplementary Table 1 Hardy–Weinberg equation comparison between the observed and expected frequencies of common gastric-cancer susceptibility alleles.

| dbSNP No.  | Gene                         | Pearson $\chi^2$ | <i>p</i> -value | LR $\chi^2$ | <i>p</i> -value | Exact<br>Significance |
|------------|------------------------------|------------------|-----------------|-------------|-----------------|-----------------------|
| rs4072037  | <i>MUC1</i>                  | 0.92             | 0.34            | 0.99        | 0.32            | 0.43                  |
| rs9841504  | <i>ZBTB20</i>                | 0.27             | 0.60            | 0.26        | 0.61            | 0.66                  |
| rs2294008  | <i>PSCA</i>                  | 1.38             | 0.24            | 1.36        | 0.24            | 0.27                  |
| rs2274223  | <i>PLCE1</i>                 | 1.12             | 0.29            | 1.09        | 0.30            | 0.32                  |
| rs13361707 | <i>PTGER4 and<br/>PRKAA1</i> | 1.84             | 0.17            | 1.85        | 0.17            | 0.21                  |
| rs2790     | <i>TYMS</i>                  | 0.34             | 0.56            | 0.34        | 0.56            | 0.61                  |

Supplementary Table 2 The frequency of each risk allele in cases and controls.

| dbSNP No.  | Gene                     | risk allele | frequency (%)      |                    |       |          | *HGP (%) |      |
|------------|--------------------------|-------------|--------------------|--------------------|-------|----------|----------|------|
|            |                          |             | Cases <sup>A</sup> | Cases <sup>B</sup> | Cases | Controls | *CHB     | *CHS |
| rs4072037  | <i>MUC1</i>              | A           | 89.2               | 89.2               | 89.2  | 82.4     | 83.5     | 81.0 |
| rs9841504  | <i>ZBTB20</i>            | C           | 16.9               | 15.7               | 16.4  | 8.3      | 10.7     | 13.8 |
| rs2294008  | <i>PSCA</i>              | T           | 40.0               | 26.5               | 34.1  | 28.4     | 24.8     | 27.1 |
| rs2274223  | <i>PLCE1</i>             | G           | 28.5               | 14.7               | 22.4  | 20.6     | 18.9     | 21.9 |
| rs13361707 | <i>PTGER4 and PRKAA1</i> | G           | 54.6               | 48.0               | 51.7  | 51.0     | 49.5     | 42.4 |
| rs2790     | <i>TYMS</i>              | G           | 43.1               | 34.3               | 39.2  | 34.8     | 41.3     | 38.1 |

\*HGP: Human Genome Project; CHB: Chinese Han Beijing; CHS: Chinese Han Southern.

Supplementary Table 3 Comparison of each SNP between Cases<sup>A</sup> and Controls (Cases<sup>B</sup>) in the co-dominant, dominant and recessive models.

| (Cases <sup>A</sup><br>vs.Controls) | #Co-dominant model |           |         |            |            |         | #Dominant model |           |         | #Recessive model |            |         |
|-------------------------------------|--------------------|-----------|---------|------------|------------|---------|-----------------|-----------|---------|------------------|------------|---------|
|                                     | *Mm vs. MM         |           |         | *mm vs. MM |            |         | OR              | 95% CI    | p-value | OR               | 95% CI     | p-value |
|                                     | OR                 | 95% CI    | p-value | OR         | 95% CI     | p-value |                 |           |         |                  |            |         |
| rs4072037                           | 0.49               | 0.23-1.02 | 0.055   | /          | /          | 0.995   | 0.47            | 0.23-0.99 | 0.046   | /                | /          | 0.999   |
| rs9841504                           | 2.13               | 0.97-4.66 | 0.059   | 3.84       | 0.32-41.66 | 0.299   | 2.22            | 1.04-4.75 | 0.039   | 3.12             | 0.27-35.50 | 0.359   |
| rs2294008                           | 1.65               | 0.84-3.24 | 0.147   | 2.97       | 1.02-8.62  | 0.045   | 1.85            | 0.97-3.52 | 0.061   | 2.29             | 0.84-6.24  | 0.104   |
| rs2274223                           | 2.03               | 1.04-3.96 | 0.037   | 1.38       | 0.36-5.28  | 0.635   | 1.92            | 1.02-3.64 | 0.044   | 1.05             | 0.28-3.88  | 0.944   |
| rs13361707                          | 1.77               | 0.75-4.19 | 0.193   | 1.66       | 0.61-4.49  | 0.322   | 0.94            | 0.45-1.95 | 0.863   | 0.58             | 0.25-1.32  | 0.193   |
| rs2790                              | 1.90               | 0.94-3.81 | 0.073   | 1.77       | 0.66-4.77  | 0.257   | 1.87            | 0.96-3.64 | 0.066   | 1.23             | 0.50-3.00  | 0.655   |

  

| (Cases <sup>A</sup> vs.<br>Cases <sup>B</sup> ) | #Co-dominant model |            |         |            |            |         | #Dominant model |           |         | #Recessive model |            |         |
|-------------------------------------------------|--------------------|------------|---------|------------|------------|---------|-----------------|-----------|---------|------------------|------------|---------|
|                                                 | *Mm vs. MM         |            |         | *mm vs. MM |            |         | OR              | 95% CI    | p-value | OR               | 95% CI     | p-value |
|                                                 | OR                 | 95% CI     | p-value | OR         | 95% CI     | p-value |                 |           |         |                  |            |         |
| rs4072037                                       | 0.82               | 0.25-2.70  | 0.742   | /          | /          | 0.993   | 0.64            | 0.20-2.00 | 0.443   | /                | /          | 0.996   |
| rs9841504                                       | 0.54               | 0.20-1.44  | 0.217   | 1.36       | 0.07-27.28 | 0.842   | 0.57            | 0.22-1.47 | 0.242   | 1.60             | 0.08-31.77 | 0.758   |
| rs2294008                                       | 2.64               | 1.05-6.67  | 0.040   | 2.62       | 0.77-8.92  | 0.123   | 2.61            | 1.13-6.03 | 0.024   | 1.77             | 0.55-5.64  | 0.335   |
| rs2274223                                       | 4.25               | 1.64-11.03 | 0.003   | 1.07       | 0.08-14.05 | 0.961   | 3.80            | 1.51-9.55 | 0.004   | 0.59             | 0.05-7.30  | 0.678   |
| rs13361707                                      | 5.28               | 1.53-18.25 | 0.009   | 3.98       | 1.01-15.65 | 0.048   | 0.90            | 0.36-2.27 | 0.823   | 0.21             | 0.06-0.68  | 0.010   |
| rs2790                                          | 2.37               | 0.96-5.83  | 0.061   | 2.15       | 0.58-7.97  | 0.252   | 2.32            | 0.98-5.52 | 0.057   | 1.27             | 0.39-4.15  | 0.689   |

\* M represents the major allele and m represents the minor allele in each SNP.

# Co-dominant model compares the difference between Mm, mm and MM; Dominant model compares the difference between (Mm+mm) and MM; Recessive model compares the difference between mm and (MM+Mm). All models are adjusted for sex, age, location and pathology in logistic regression model.

Supplementary Table 4 Population attributable risk and total variance in risk.

| dbSNP No.  | Gene*                    | Fraction of Total Variance | Population          |
|------------|--------------------------|----------------------------|---------------------|
|            |                          | in Risk Explained §        | Attributable Risk § |
|            |                          | %                          |                     |
| rs4072037  | <i>MUC1</i>              | 6.7                        | 78.0                |
| rs9841504  | <i>ZBTB20</i>            | 7.0                        | 18.8                |
| rs2294008  | <i>PSCA</i>              | 8.7                        | 37.2                |
| rs2274223  | <i>PLCE1</i>             | 4.4                        | 20.9                |
| rs13361707 | <i>PTGER4 and PRKAA1</i> | 1.2                        | 19.3                |
| rs2790     | <i>TYMS</i>              | 4.0                        | 27.6                |

\* These genes are within the linkage-disequilibrium block or blocks defined by the associated variant and are plausible candidates for the causal gene.

§ See the Supplementary Methods for details.

Supplementary Table 5 Subgroup analysis between Cases<sup>A</sup> and Cases<sup>B\*</sup>.

| Exposure   | MUC1 rs4072037  |            |         | ZBTB20 rs9841504                |            |         | PSCA rs2294008 |            |         |  |
|------------|-----------------|------------|---------|---------------------------------|------------|---------|----------------|------------|---------|--|
|            | OR              | 95% CI     | p-value | OR                              | 95% CI     | p-value | OR             | 95% CI     | p-value |  |
| Sex        |                 |            |         |                                 |            |         |                |            |         |  |
| Male       | 1.12            | 0.30-4.20  | 0.87    | 0.82                            | 0.26-2.62  | 0.74    | 1.84           | 0.83-4.08  | 0.132   |  |
| Female     | 3.14            | 0.55-17.81 | 0.196   | 0.53                            | 0.15-1.93  | 0.338   | 2.18           | 0.84-5.72  | 0.111   |  |
| Age        |                 |            |         |                                 |            |         |                |            |         |  |
| <=40       | 0.9             | 0.23-3.56  | 0.884   | 1.07                            | 0.30-3.77  | 0.919   | 3.47           | 1.20-10.01 | 0.021   |  |
| 40-50      | 3.56            | 0.66-19.27 | 0.141   | 0.73                            | 0.23-2.29  | 0.586   | 1.81           | 0.82-3.99  | 0.14    |  |
| Location   |                 |            |         |                                 |            |         |                |            |         |  |
| Non-cardia | 1.16            | 0.39-3.45  | 0.791   | 0.56                            | 0.22-1.39  | 0.211   | 2.47           | 1.20-5.06  | 0.014   |  |
| Cardia     | /               | /          | 0.996   | /                               | /          | 0.995   | 1.88           | 0.45-7.96  | 0.389   |  |
| Pathology  |                 |            |         |                                 |            |         |                |            |         |  |
| Diffuse    | 3.67            | 0.68-19.99 | 0.132   | 0.58                            | 0.20-1.69  | 0.318   | 2.24           | 0.92-5.46  | 0.076   |  |
| Intestinal | 2.45            | 0.35-17.03 | 0.364   | 0.96                            | 0.06-15.82 | 0.977   | 3.35           | 0.98-11.42 | 0.053   |  |
| Mixed      | /               | /          | 0.997   | 5.33                            | 0.43-66.34 | 0.193   | 0.18           | 0.02-1.37  | 0.097   |  |
| Exposure   | PLCE1 rs2274223 |            |         | PTGER4 and PRKAA1<br>rs13361707 |            |         | TYMS rs2790    |            |         |  |
|            | OR              | 95% CI     | p-value | OR                              | 95% CI     | p-value | OR             | 95% CI     | p-value |  |
| Sex        |                 |            |         |                                 |            |         |                |            |         |  |
| Male       | 5.37            | 1.83-15.78 | 0.002   | 1.6                             | 0.75-3.40  | 0.222   | 2.36           | 1.09-5.13  | 0.029   |  |
| Female     | 1.07            | 0.31-3.71  | 0.919   | 1.69                            | 0.65-4.39  | 0.281   | 0.88           | 0.34-2.26  | 0.794   |  |
| Age        |                 |            |         |                                 |            |         |                |            |         |  |
| <=40       | 0.95            | 0.30-3.04  | 0.928   | 1.82                            | 0.66-5.01  | 0.245   | 1.4            | 0.52-3.76  | 0.504   |  |
| 40-50      | 7.42            | 2.23-24.74 | 0.001   | 1.55                            | 0.74-3.22  | 0.242   | 2.06           | 0.96-4.44  | 0.063   |  |
| Location   |                 |            |         |                                 |            |         |                |            |         |  |
| Non-cardia | 3.02            | 1.14-8.04  | 0.027   | 1.42                            | 0.72-2.79  | 0.313   | 1.77           | 0.89-3.53  | 0.104   |  |
| Cardia     | 2.84            | 0.72-11.17 | 0.135   | 2.7                             | 0.75-9.69  | 0.129   | 1.6            | 0.47-5.51  | 0.456   |  |
| Pathology  |                 |            |         |                                 |            |         |                |            |         |  |
| Diffuse    | 4.4             | 1.38-14.02 | 0.012   | 1.07                            | 0.47-2.43  | 0.874   | 1.44           | 0.65-3.22  | 0.371   |  |
| Intestinal | 3.56            | 0.82-15.50 | 0.091   | 1.93                            | 0.60-6.20  | 0.269   | 1.38           | 0.43-4.46  | 0.589   |  |
| Mixed      | 0.18            | 0.01-3.61  | 0.26    | 2.73                            | 0.44-16.81 | 0.279   | 3.77           | 0.60-23.63 | 0.156   |  |

\* Odds ratios were adjusted for age, sex, location, and pathology in unconditional logistic regression models.

## References

1. Shi Y, Hu Z, Wu C, Dai J, Li H, et al. (2011) A genome-wide association study identifies new susceptibility loci for non-cardia gastric cancer at 3q13.31 and 5p13.1. *Nat Genet* 43: 1215-1218.
2. Abnet CC, Freedman ND, Hu N, Wang Z, Yu K, et al. (2010) A shared susceptibility locus in *PLCE1* at 10q23 for gastric adenocarcinoma and esophageal squamous cell carcinoma. *Nat Genet* 42: 764-767.
3. Sakamoto H, Yoshimura K, Saeki N, Katai H, Shimoda T, et al. (2008) Genetic variation in *PSCA* is associated with susceptibility to diffuse-type gastric cancer. *Nat Genet* 40: 730-740.
4. Shen R, Liu H, Wen J, Liu Z, Wang LE, et al. (2014) Genetic polymorphisms in the microRNA binding-sites of the thymidylate synthase gene predict risk and survival in gastric cancer. *Mol Carcinog*.
5. Pharoah PD, Antoniou A, Bobrow M, Zimmern RL, Easton DF, et al. (2002) Polygenic susceptibility to breast cancer and implications for prevention. *Nat Genet* 31: 33-36.
6. Gao Y, Hu N, Han X, Giffen C, Ding T, et al. (2009) Family history of cancer and risk for esophageal and gastric cancer in Shanxi, China. *BMC Cancer* 9: 269.
7. Jiang X, Tseng CC, Bernstein L, Wu AH (2014) Family history of cancer and gastroesophageal disorders and risk of esophageal and gastric adenocarcinomas: a case-control study. *BMC Cancer* 14: 60.
8. Yatsuya H, Toyoshima H, Mizoue T, Kondo T, Tamakoshi K, et al. (2002) Family history and the risk of stomach cancer death in Japan: differences by age and gender. *Int J Cancer* 97: 688-694.
9. Pharoah PD, Antoniou AC, Easton DF, Ponder BA (2008) Polygenes, risk prediction, and targeted prevention of breast cancer. *N Engl J Med* 358: 2796-2803.
